# Supplementary material for: An integrated analysis of prognostic and immune infiltrates for hub genes as potential survival indicators in patients with lung adenocarcinoma
Source: PubMed Central journal article supplement (PMC8966338; doi:10.1186/s12957-022-02543-z), 2022-03-30

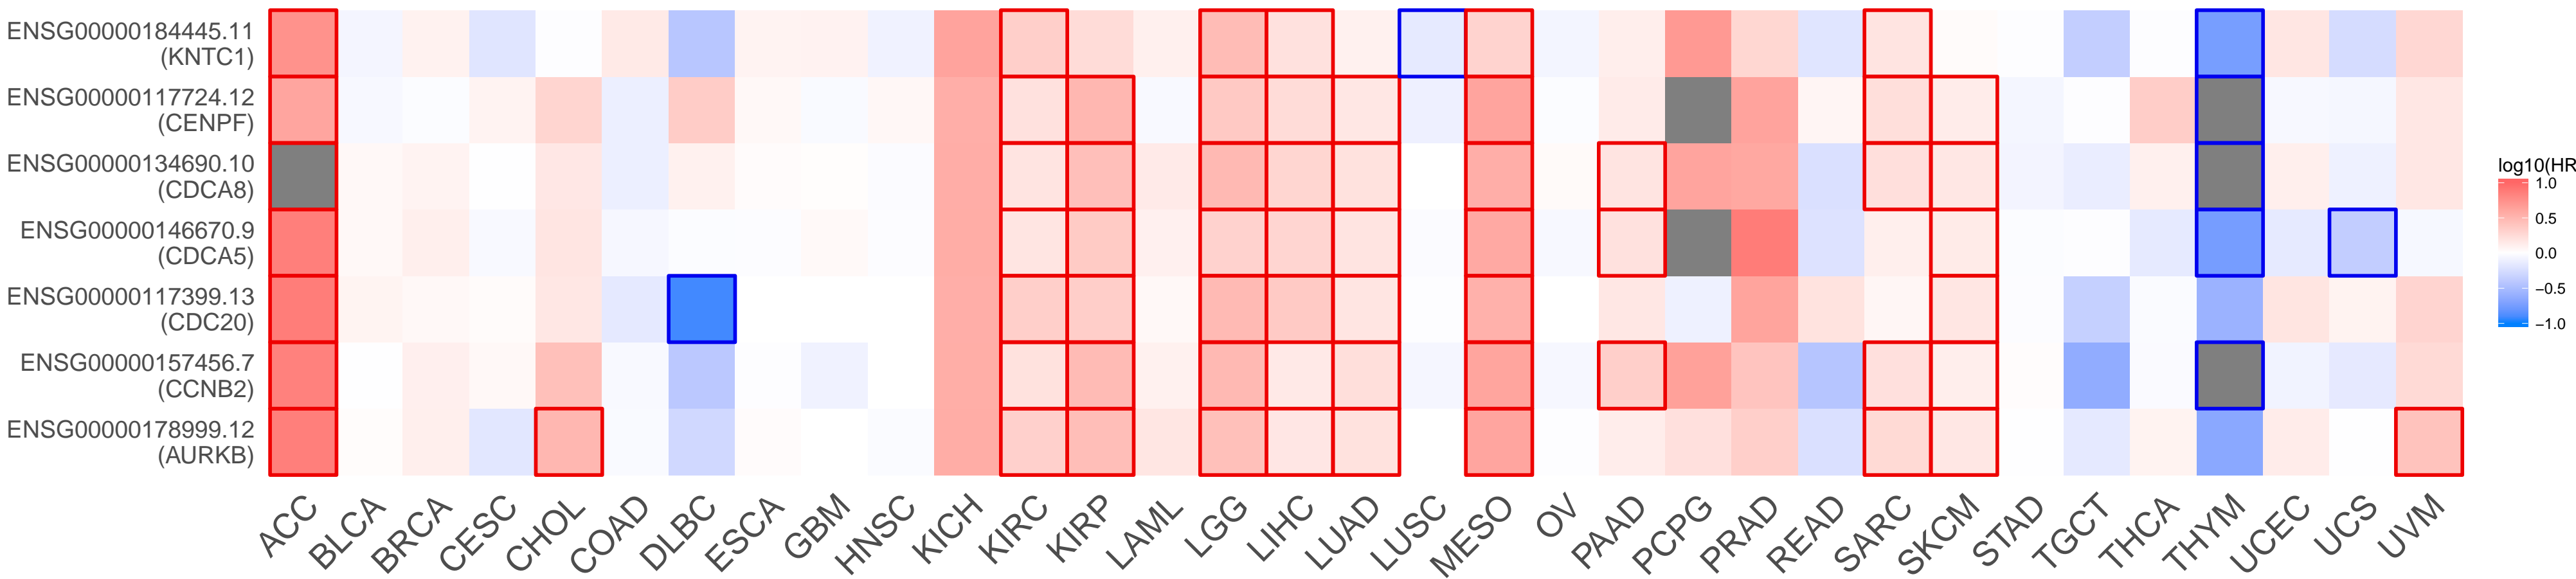

Supplement: 12957_2022_2543_MOESM2_ESM.pdf [file 12957_2022_2543_MOESM2_ESM.pdf]
